# Supplementary material
Source: PubMed Central journal article supplement (PMC6626662)
Supplement: NIHMS1039890-supplement-1.pdf [file NIHMS1039890-supplement-1.pdf]

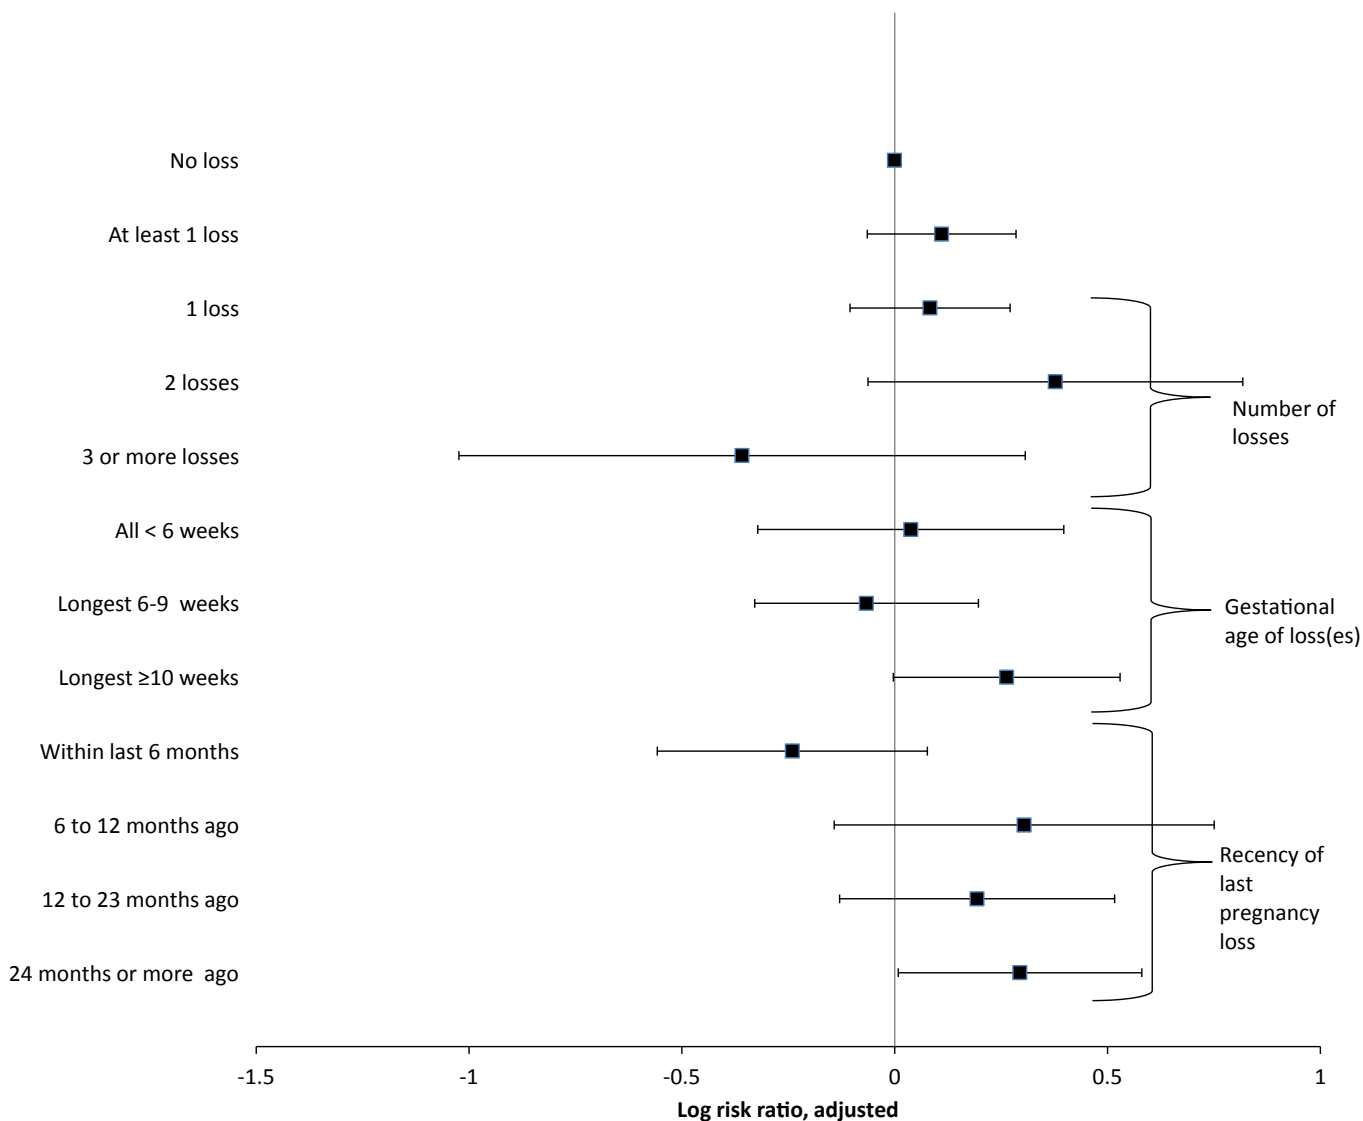

**Supplemental Fig. 1.** Risk ratio for preterm birth at first parity by three aspects of pregnancy loss history, National Survey of Family Growth 1995–2013. Adjusted for age at conception, age at conception squared, height, race and/or ethnicity, marital status at pregnancy outcome, ever smoked, history of induced abortion, education, poverty level, ever received medical help getting pregnant, and year of conception. Models included the following number of observations: 20,047 (number of losses), 20,047 (gestational age of loss(es)), and 19,966 (recency of last pregnancy loss).

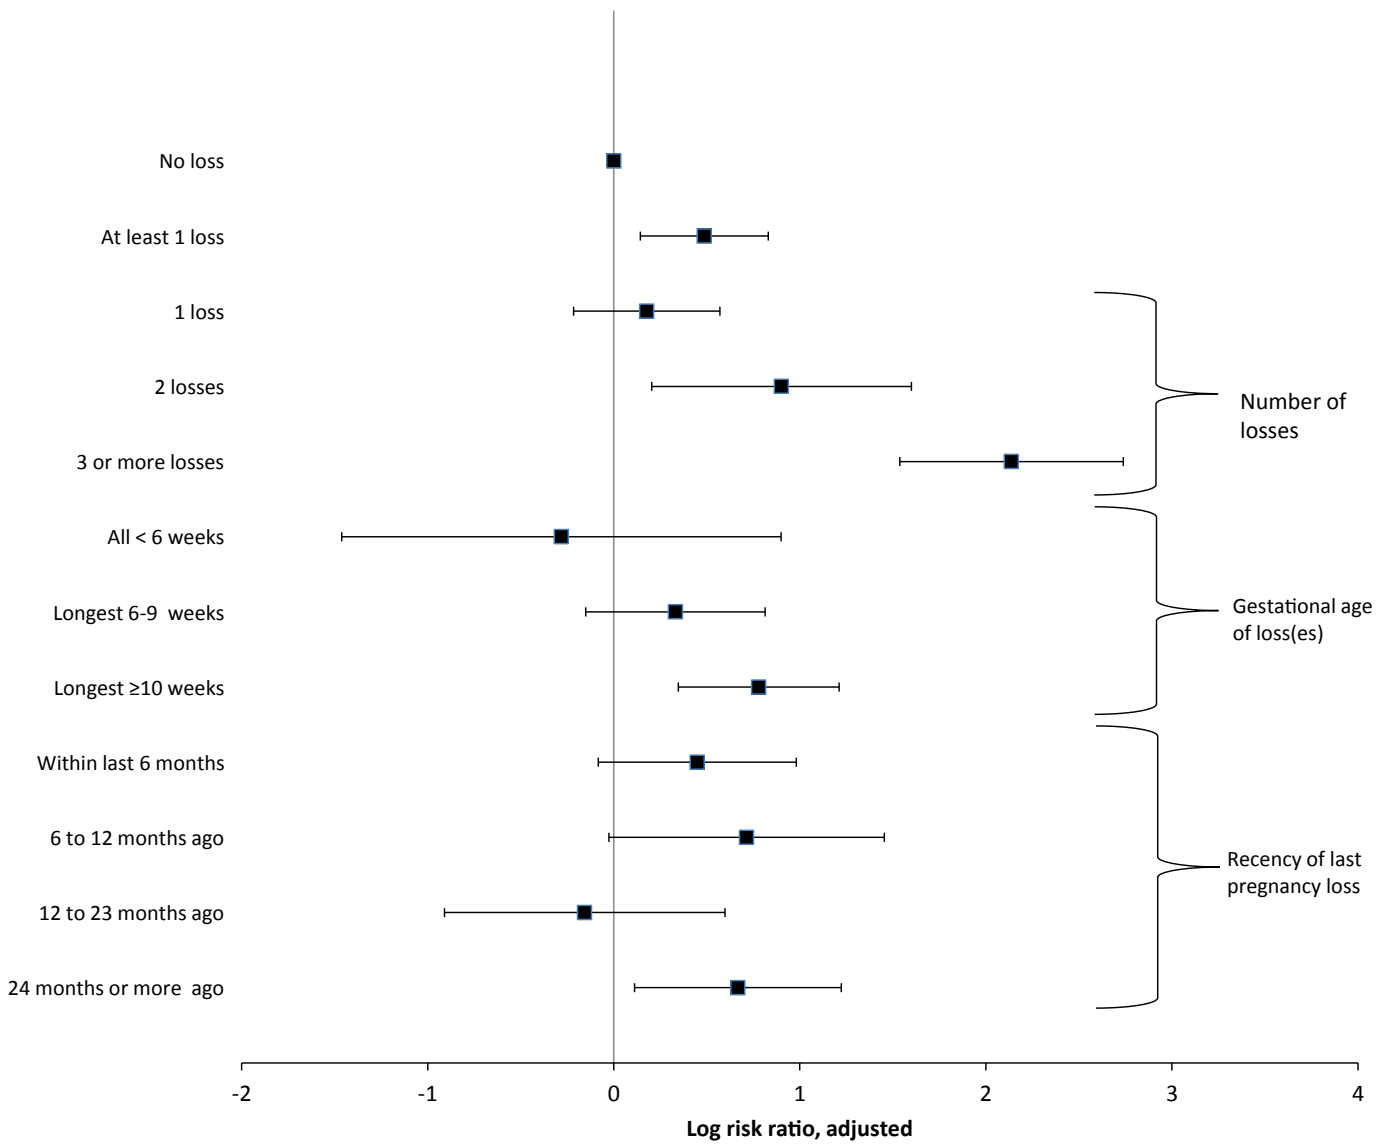

**Supplemental Fig. 2.** Risk ratio for stillbirth at first parity by three aspects of pregnancy loss history, National Survey of Family Growth 1995–2013. Adjusted for age at conception, age at conception squared, height, race/ethnicity, marital status at pregnancy outcome, ever smoked, history of induced abortion, education, poverty level, ever received medical help getting pregnant, and year of conception. Models included the following number of observations: 20,047 (number of losses), 20,047 (gestational age of loss(es)), and 19,966 (recency of last pregnancy loss).

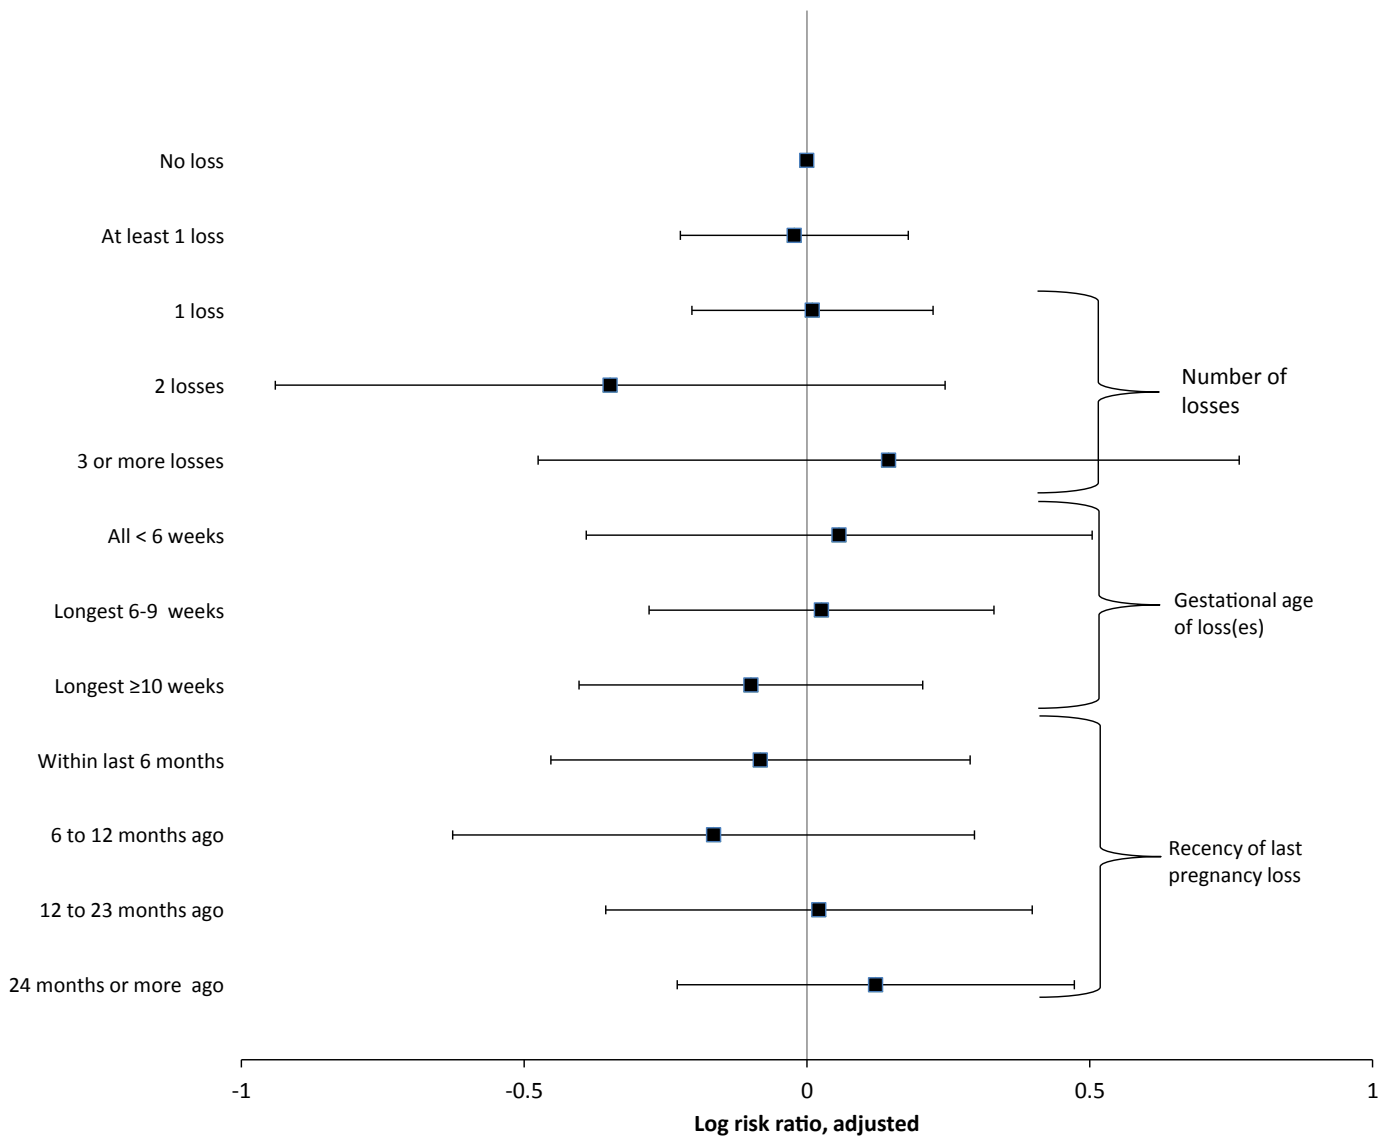

**Supplemental Fig. 3.** Risk ratio for low birthweight at first parity by three aspects of pregnancy loss history, National Survey of Family Growth 1995–2013. Adjusted for age at conception, age at conception squared, height, race and/or ethnicity, marital status at pregnancy outcome, ever smoked, history of induced abortion, education, poverty level, ever received medical help getting pregnant, and year of conception. Models included the following number of observations: 20,047 (number of losses), 20,047 (gestational age of loss(es)), and 19,966 (recency of last pregnancy loss).

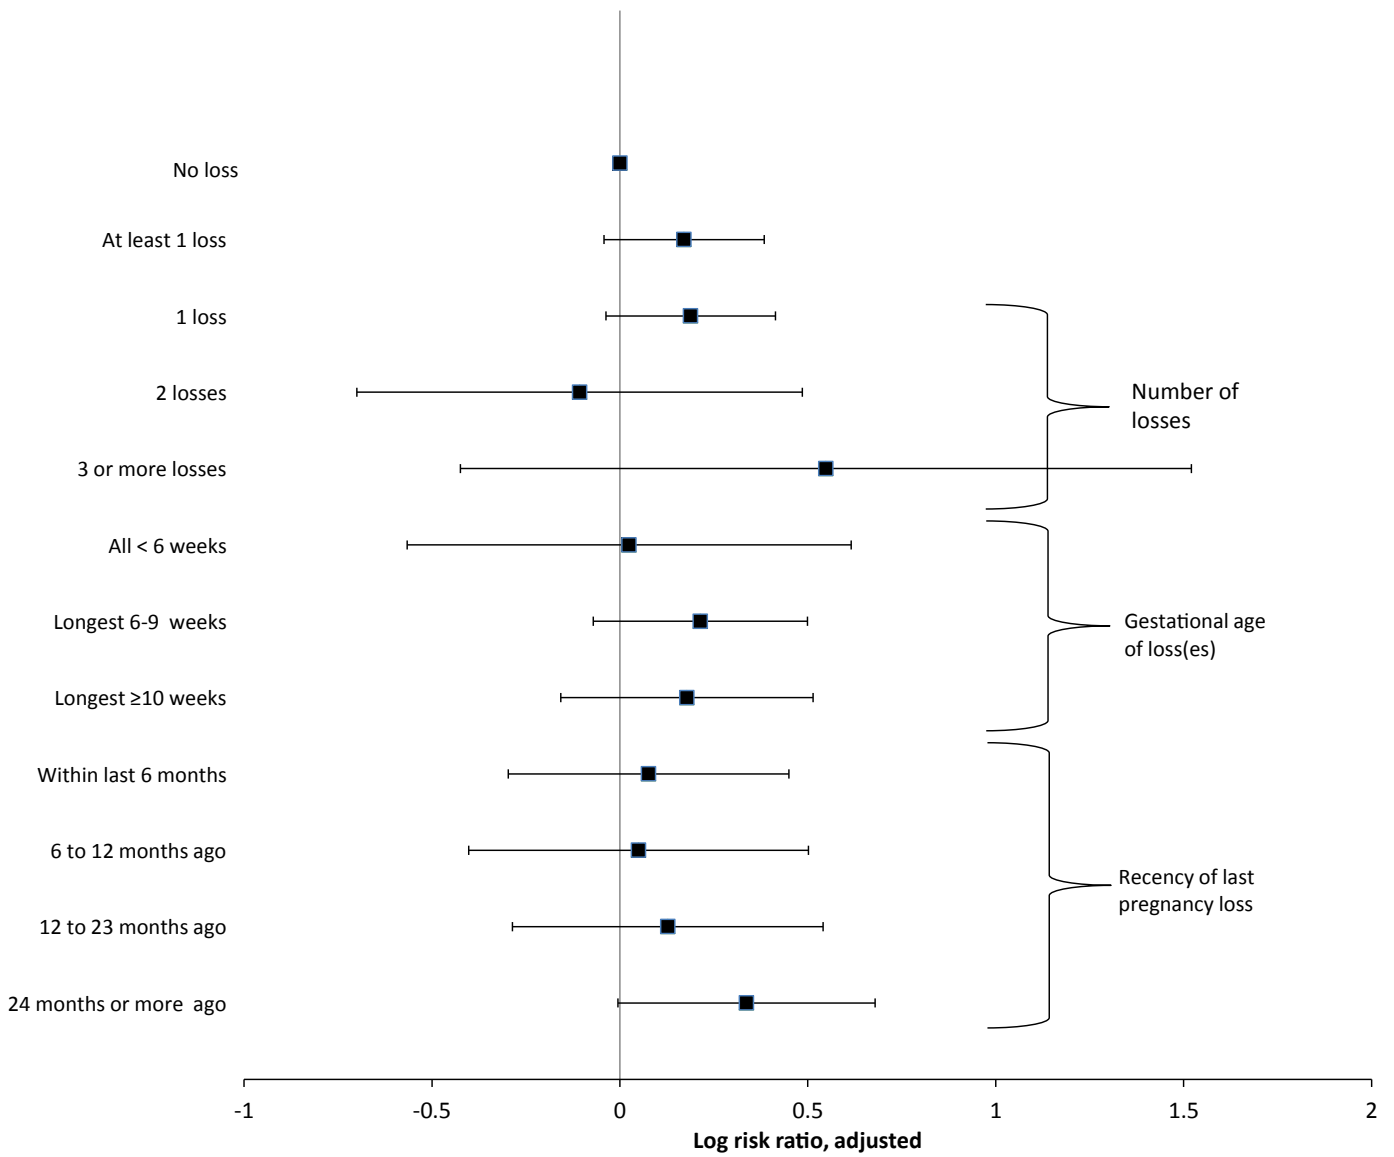

**Supplemental Fig. 4.** Risk ratio for preterm birth at any future pregnancy by three aspects of pregnancy loss history at first parity, National Survey of Family Growth 1995–2013. Adjusted for age at conception, age at conception squared, height, race and/or ethnicity, marital status at pregnancy outcome, ever smoked, history of induced abortion, education, poverty level, ever received medical help getting pregnant, and year of conception. Models included the following number of observations: 15,008 (number of losses), 15,008 (gestational age of loss(es)), and 14,950 (recency of last pregnancy loss).

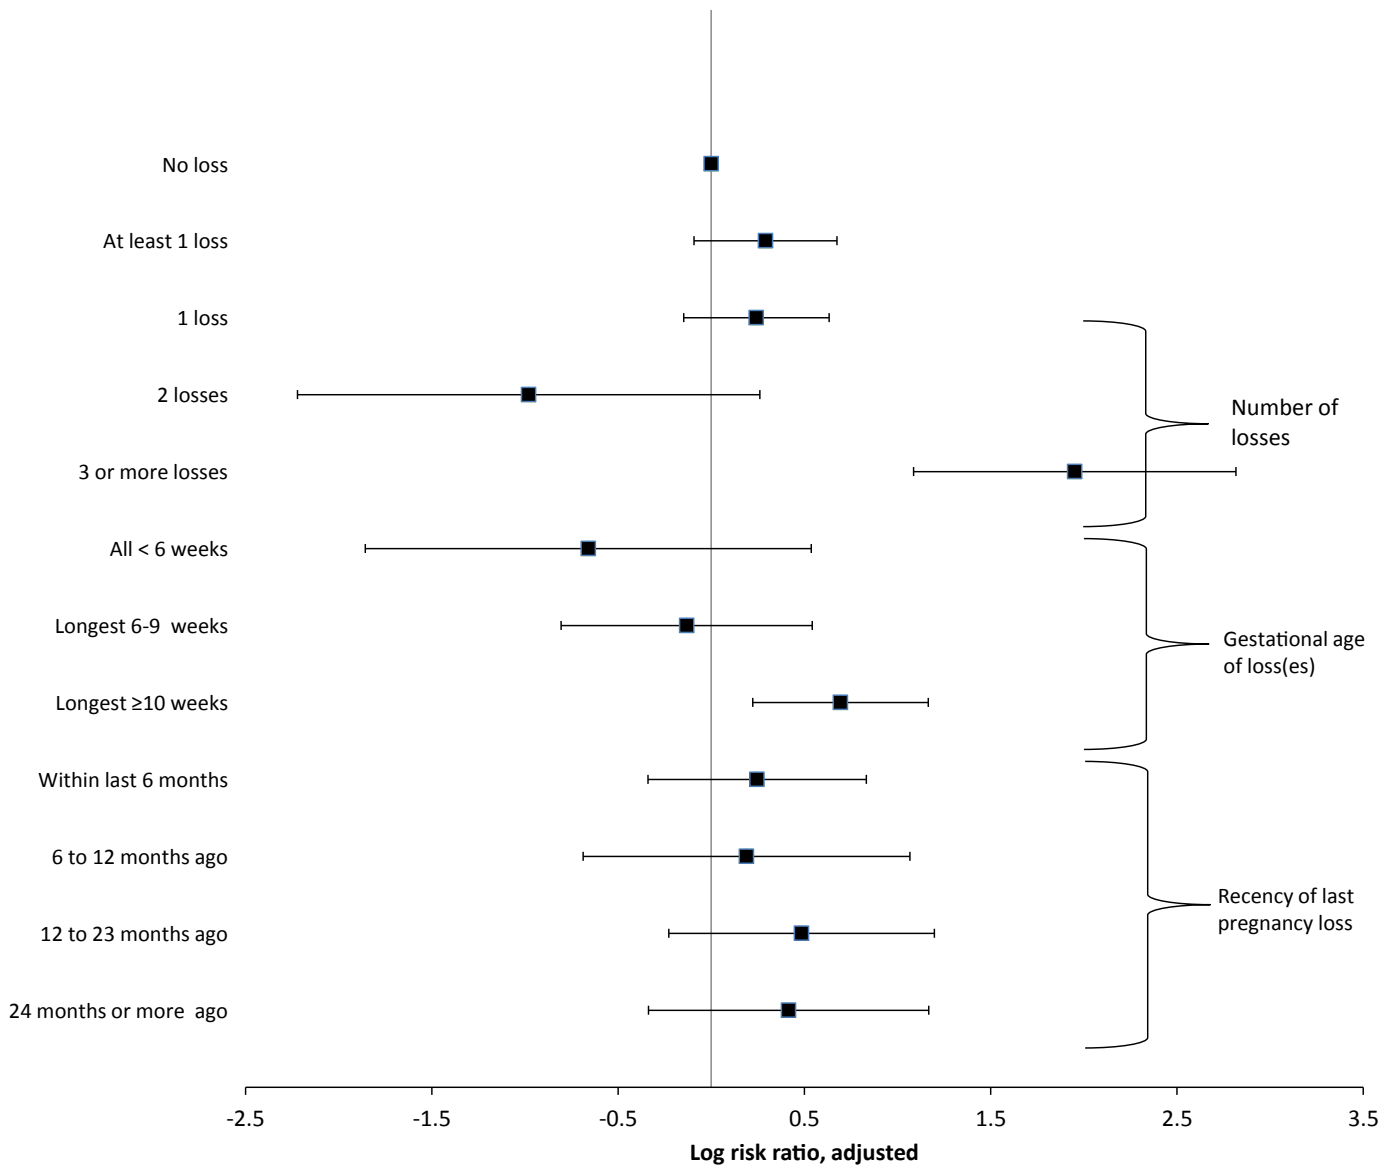

**Supplemental Fig. 5.** Risk ratio for stillbirth at any future pregnancy by three aspects of pregnancy loss history at first parity, National Survey of Family Growth 1995–2013. Adjusted for age at conception, age at conception squared, height, race/ethnicity, marital status at pregnancy outcome, ever smoked, history of induced abortion, education, poverty level, ever received medical help getting pregnant and year of conception. Models included the following number of observations: 15,008 (number of losses), 15,008 (gestational age of loss(es)), and 14,950 (recency of last pregnancy loss).

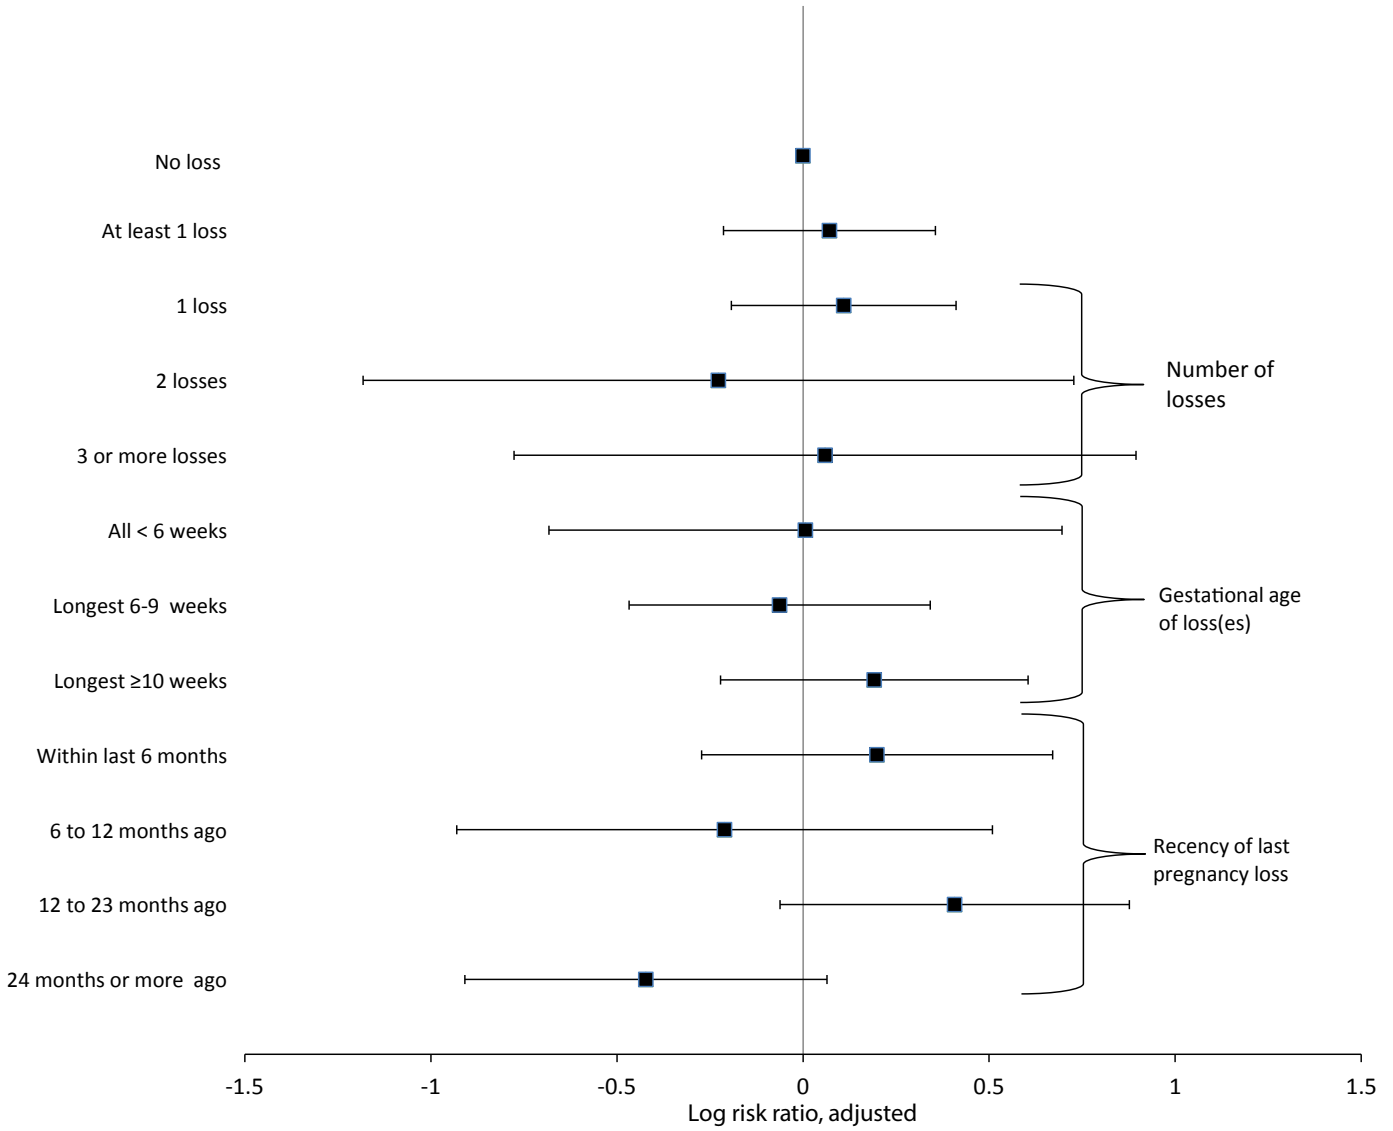

**Supplemental Fig. 6.** Risk ratio for low birthweight at any future pregnancy by three aspects of pregnancy loss history at first parity, National Survey of Family Growth 1995–2013. Adjusted for age at conception, age at conception squared, height, race/ethnicity, marital status at pregnancy outcome, ever smoked, history of induced abortion, education, poverty level, ever received medical help getting pregnant, and year of conception. Models included the following number of observations: 15,008 (number of losses), 15,008 (gestational age of loss(es)), and 14,950 (recency of last pregnancy loss).

**Supplemental Table 1**

Gestational age of loss(es) among women at first parity, by participant and pregnancy loss characteristics, National Survey of Family Growth 1995 through 2011–2013

| Participant and pregnancy loss characteristics        | n      | No loss                      | All < 6 weeks            | Longest 6–9 weeks        | Longest ≥ 10 weeks        |
|-------------------------------------------------------|--------|------------------------------|--------------------------|--------------------------|---------------------------|
|                                                       |        | n = 19,000 (88.8%)<br>% (SE) | n = 379 (1.8%)<br>% (SE) | n = 896 (4.4%)<br>% (SE) | n = 1002 (5.1%)<br>% (SE) |
| All                                                   | 21,277 |                              |                          |                          |                           |
| Age, y <sup>*</sup> : mean ± SE                       | 21,277 | 22.9 ± 0.1                   | 25.0 ± 0.4               | 25.2 ± 0.3               | 25.7 ± 0.3                |
| Height, inches: mean ± SE                             | 20,585 | 64.6 ± 0.04                  | 64.8 ± 0.20              | 64.9 ± 0.22              | 64.5 ± 0.17               |
| Hispanic origin and race                              |        |                              |                          |                          |                           |
| Hispanic or Latina                                    | 4835   | 18.5 (0.9)                   | 12.3 (2.0)               | 12.7 (1.3)               | 12.8 (1.5)                |
| Non-Hispanic white                                    | 10,474 | 60.5 (1.0)                   | 64.9 (3.7)               | 69.5 (2.1)               | 70.3 (2.2)                |
| Non-Hispanic black                                    | 5081   | 15.7 (0.6)                   | 14.7 (2.2)               | 12.5 (1.8)               | 11.4 (1.4)                |
| Non-Hispanic other                                    | 887    | 5.4 (0.6)                    | 8.2 (2.2)                | 5.4 (1.0)                | 5.5 (1.2)                 |
| Marital status <sup>†</sup>                           |        |                              |                          |                          |                           |
| Married                                               | 10,875 | 56.5 (0.7)                   | 60.2 (3.6)               | 66.2 (2.6)               | 68.3 (2.1)                |
| Widowed/divorced/separated                            | 537    | 2.2 (0.1)                    | 2.0 (0.7)                | 4.0 (0.7)                | 5.3 (1.1)                 |
| Never married                                         | 9865   | 41.4 (0.7)                   | 37.8 (3.6)               | 29.8 (2.5)               | 26.4 (2.1)                |
| Educational attainment at time of interview           |        |                              |                          |                          |                           |
| No high school diploma or GED                         | 4374   | 17.4 (0.51)                  | 16.6 (2.6)               | 13.4 (1.3)               | 12.2 (1.4)                |
| High school diploma or GED                            | 7454   | 34.6 (0.56)                  | 33.5 (3.1)               | 33.4 (2.4)               | 29.8 (1.9)                |
| Some college, no bachelor's degree                    | 5739   | 27.6 (0.55)                  | 26.2 (3.8)               | 27.5 (2.0)               | 31.7 (2.2)                |
| Bachelor's degree                                     | 2714   | 14.6 (0.5)                   | 14.6 (2.6)               | 17.2 (2.0)               | 19.5 (2.1)                |
| Master's degree or higher                             | 996    | 5.8 (0.32)                   | 9.2 (2.3)                | 8.5 (1.4)                | 6.8 (1.5)                 |
| Percentage of poverty level at time of interview      |        |                              |                          |                          |                           |
| Less than 100%                                        | 5874   | 23.9 (0.6)                   | 23.6 (2.7)               | 18.0 (1.8)               | 18.6 (1.7)                |
| 100%–299%                                             | 9164   | 42.5 (0.6)                   | 41.4 (3.8)               | 40.2 (2.6)               | 41.5 (2.2)                |
| 300%–399%                                             | 2706   | 14.7 (0.4)                   | 15.5 (3.1)               | 18.0 (1.8)               | 15.8 (1.7)                |
| 400% or more                                          | 3533   | 18.9 (0.6)                   | 19.6 (3.7)               | 23.8 (2.0)               | 24.1 (2.2)                |
| Ever smoked cigarettes <sup>‡</sup>                   |        |                              |                          |                          |                           |
| Yes                                                   | 8896   | 42.1 (0.7)                   | 46.6 (3.8)               | 47.5 (2.5)               | 48.3 (2.4)                |
| No                                                    | 12,306 | 57.9 (0.7)                   | 53.4 (3.8)               | 52.5 (2.5)               | 51.7 (2.4)                |
| Intendedness of first parity pregnancy at conception  |        |                              |                          |                          |                           |
| Intended                                              | 11,867 | 56.4 (0.6)                   | 78.7 (2.6)               | 76.1 (2.1)               | 78.5 (2.0)                |
| Mistimed                                              | 7277   | 34.5 (0.6)                   | 16.9 (2.4)               | 18.8 (2.0)               | 16.1 (1.7)                |
| Unwanted                                              | 2125   | 9.2 (0.3)                    | 4.5 (1.1)                | 5.2 (0.9)                | 5.4 (1.3)                 |
| Any medical help to become pregnant ever <sup>§</sup> |        |                              |                          |                          |                           |
| Yes                                                   | 1477   | 7.6 (0.3)                    | 11.0 (2.9)               | 16.2 (2.1)               | 15.8 (2.0)                |
| Multiple live births at first parity                  |        |                              |                          |                          |                           |
| Yes                                                   | 220    | 0.9 (0.1)                    | 3.9 (1.5)                | 1.9 (1.1)                | 1.0 (0.3)                 |
| History of induced abortion <sup>  </sup>             |        |                              |                          |                          |                           |
| Yes                                                   | 2212   | 10.2 (0.4)                   | 17.7 (3.6)               | 7.8 (1.1)                | 13.1 (1.4)                |
| Recency of last pregnancy loss <sup>¶</sup>           |        |                              |                          |                          |                           |
| Within last 6 months                                  | 791    | NA                           | 33.2 (3.2)               | 36.9 (2.4)               | 35.3 (2.1)                |
| 6–11 months ago                                       | 390    | NA                           | 18.2 (3.1)               | 16.9 (1.9)               | 21.3 (2.3)                |
| 12–23 months ago                                      | 427    | NA                           | 14.6 (2.4)               | 18.7 (1.8)               | 21.2 (2.0)                |
| 24 months or more ago                                 | 585    | NA                           | 33.9 (4.1)               | 27.6 (2.1)               | 22.3 (1.8)                |

GED = general educational development.

<sup>\*</sup> Age at time of first parity conception.<sup>†</sup> Marital status at end of first parity pregnancy.<sup>‡</sup> Ever smoked at least 100 cigarettes in lifetime.<sup>§</sup> Ever received medical help to become pregnant in lifetime, not specific to first parity.<sup>||</sup> History of induced abortion only included women whose first induced abortion occurred before her first pregnancy loss.<sup>¶</sup> Recency of last pregnancy loss calculated as the difference, in months, between the month of the most recent pregnancy loss and the month of conception at first parity. Recency of loss was restricted to women whose most recent pregnancy resulted in loss, which excluded 84 women whose most recent pregnancy was either an ectopic pregnancy ( $n = 22$ ) or induced abortion ( $n = 62$ ).

**Supplemental Table 2**

Recency of last pregnancy loss among women at first parity, by participant and pregnancy loss characteristics, National Survey of Family Growth 1995 through 2011–2013

| Participant and pregnancy loss characteristics       | n      | No loss      | <6 mo       | 6–11 mo     | 12–23 mo    | 24+ mo      |
|------------------------------------------------------|--------|--------------|-------------|-------------|-------------|-------------|
|                                                      |        | n = 19,000   | n = 791     | n = 390     | n = 427     | n = 585     |
|                                                      |        | 89.1%        | 3.9%        | 2.1%        | 2.1%        | 2.8%        |
|                                                      |        | % (SE)       | % (SE)      | % (SE)      | % (SE)      | % (SE)      |
| All                                                  | 21,193 |              |             |             |             |             |
| Age, years* : mean ± SE                              | 21,193 | 22.2 ± 0.1   | 24.4 ± 0.3  | 24.2 ± 0.4  | 24.3 ± 0.4  | 25.4 ± 0.3  |
| Height, inches: mean ± SE                            | 20,503 | 64.6 ± 0.04  | 64.6 ± 0.22 | 64.4 ± 0.24 | 64.9 ± 0.33 | 65.0 ± 0.27 |
| Hispanic origin and race                             |        |              |             |             |             |             |
| Hispanic or Latina                                   | 4817   | 18.5 (0.9)   | 13.5 (1.6)  | 10.4 (1.5)  | 16.0 (2.4)  | 10.4 (1.4)  |
| Non-Hispanic white                                   | 10,437 | 60.5 (1.0)   | 70.3 (2.3)  | 68.0 (3.4)  | 69.2 (3.1)  | 69.9 (2.6)  |
| Non-Hispanic black                                   | 5055   | 15.7 (0.6)   | 11.7 (1.7)  | 14.7 (3.2)  | 11.1 (1.6)  | 11.3 (1.4)  |
| Non-Hispanic other                                   | 884    | 5.4 (0.6)    | 4.5 (1.0)   | 6.9 (1.9)   | 3.8 (1.1)   | 8.4 (1.8)   |
| Marital status†                                      |        |              |             |             |             |             |
| Married                                              | 10,830 | 56.5 (0.7)   | 73.8 (2.3)  | 68.6 (3.8)  | 61.7 (3.4)  | 57.6 (2.7)  |
| Widowed/divorced/separated                           | 529    | 2.2 (0.1)    | 2.1 (0.6)   | 2.4 (1.1)   | 3.2 (0.9)   | 8.1 (1.4)   |
| Never married                                        | 9834   | 41.4 (0.7)   | 24.1 (2.2)  | 29.1 (3.6)  | 35.1 (3.4)  | 34.3 (2.7)  |
| Educational attainment at time of interview          |        |              |             |             |             |             |
| No high school diploma or GED                        | 4363   | 17.44 (0.51) | 12.9 (1.4)  | 12.4 (2.0)  | 14.0 (2.1)  | 14.7 (1.9)  |
| High school diploma or GED                           | 7424   | 34.56 (0.56) | 28.2 (2.2)  | 31.6 (3.5)  | 37.2 (3.2)  | 31.6 (2.5)  |
| Some college, no bachelor's degree                   | 5715   | 27.6 (0.55)  | 28.4 (2.3)  | 31.2 (4.0)  | 24.3 (2.6)  | 33.5 (3.1)  |
| Bachelor's degree                                    | 2704   | 14.64 (0.5)  | 20.4 (2.2)  | 18.5 (2.9)  | 18.1 (3.4)  | 13.8 (2.0)  |
| Master's degree or higher                            | 987    | 5.77 (0.32)  | 10.2 (2.1)  | 6.3 (1.6)   | 6.5 (1.6)   | 6.5 (1.6)   |
| Percentage of poverty level at time of interview     |        |              |             |             |             |             |
| Less than 100%                                       | 5856   | 23.9 (0.6)   | 16.1 (1.7)  | 16.3 (2.4)  | 22.7 (2.8)  | 23.1 (2.3)  |
| 100%–299%                                            | 9131   | 42.5 (0.6)   | 40.9 (2.8)  | 43.5 (4.0)  | 41.0 (3.5)  | 41.0 (3.1)  |
| 300%–399%                                            | 2693   | 14.7 (0.4)   | 17.5 (1.9)  | 17.5 (3.0)  | 13.1 (2.4)  | 15.5 (2.1)  |
| 400% or more                                         | 3513   | 18.9 (0.6)   | 25.6 (2.3)  | 22.7 (3.7)  | 23.2 (3.3)  | 20.4 (2.7)  |
| Ever smoked cigarettes‡                              |        |              |             |             |             |             |
| Yes                                                  | 8842   | 42.1 (0.7)   | 41.5 (2.7)  | 45.1 (4.0)  | 47.0 (3.5)  | 56.7 (2.8)  |
| No                                                   | 12,276 | 57.9 (0.7)   | 58.5 (2.7)  | 54.9 (4.0)  | 53.0 (3.5)  | 43.4 (2.8)  |
| Intendedness of first parity pregnancy at conception |        |              |             |             |             |             |
| Intended                                             | 11,801 | 56.4 (0.6)   | 80.5 (2.0)  | 75.1 (4.2)  | 74.4 (3.0)  | 76.4 (2.4)  |
| Mistimed                                             | 7266   | 34.5 (0.6)   | 16.5 (1.8)  | 18.4 (3.5)  | 19.8 (2.8)  | 16.8 (2.2)  |
| Unwanted                                             | 2118   | 9.2 (0.3)    | 3.0 (0.6)   | 6.5 (3.0)   | 5.8 (1.3)   | 6.9 (1.3)   |
| Any medical help to become pregnant ever§            |        |              |             |             |             |             |
| Yes                                                  | 1467   | 7.6 (0.3)    | 15.0 (1.9)  | 12.8 (3.1)  | 15.0 (3.1)  | 16.8 (2.7)  |
| Multiple live births at first parity                 |        |              |             |             |             |             |
| Yes                                                  | 219    | 0.9 (0.1)    | 1.0 (0.3)   | 1.6 (1.1)   | 0.9 (0.5)   | 4.0 (1.7)   |
| History of induced abortion                          |        |              |             |             |             |             |
| Yes                                                  | 2201   | 10.2 (0.4)   | 9.4 (1.4)   | 10.6 (2.3)  | 13.9 (2.8)  | 13.7 (2.4)  |
| Gestational age of loss(es)                          |        |              |             |             |             |             |
| All < 6 weeks                                        | 366    | 0.0 (NA)     | 15.3 (1.6)  | 15.6 (2.7)  | 12.5 (2.1)  | 21.1 (2.7)  |
| Longest 6–9 weeks                                    | 856    | 0.0 (NA)     | 40.1 (2.5)  | 34.2 (3.7)  | 37.6 (3.2)  | 40.6 (2.7)  |
| Longest ≥ 10 weeks                                   | 971    | 0.0 (NA)     | 44.6 (2.6)  | 50.2 (4.2)  | 49.9 (3.4)  | 38.3 (2.9)  |

GED = general educational development.

Recency of last pregnancy loss calculated as the difference, in months, between the month of the most recent pregnancy loss and the month of the conception at first parity. Recency of loss was restricted to women whose most recent pregnancy resulted in loss, which excluded 84 women whose most recent pregnancy was either an ectopic pregnancy ( $n = 22$ ) or induced abortion ( $n = 62$ ).

\* Age at time of first parity conception.

† Marital status at end of first parity pregnancy.

‡ Ever smoked at least 100 cigarettes in lifetime.

§ Ever received medical help to become pregnant in lifetime, not specific to first parity.

|| History of induced abortion only included women whose first induced abortion occurred before her first pregnancy loss.



**Supplemental Table 3**

Percentage of women at first parity with any future pregnancy, live birth, miscarriage, induced termination or ectopic pregnancy reported by the time of interview, by three aspects of pregnancy loss history at first parity, National Survey of Family Growth 1995 through 2011–2013

| Pregnancy loss history                | n      | Any future pregnancy<br>(n = 15,979) | Any future live<br>birth (n = 14,281) | Any future<br>miscarriage (n = 3326) | Any future induced<br>termination (n = 2230) | Any future ectopic<br>pregnancy (n = 460) |
|---------------------------------------|--------|--------------------------------------|---------------------------------------|--------------------------------------|----------------------------------------------|-------------------------------------------|
|                                       |        | % (SE)                               | % (SE)                                | % (SE)                               | % (SE)                                       | % (SE)                                    |
| All                                   | 21,277 | 76.3 (0.4)                           | 69.1 (0.5)                            | 16.8 (0.5)                           | 9.1 (0.3)                                    | 1.9 (0.2)                                 |
| Number of pregnancy losses            |        |                                      |                                       |                                      |                                              |                                           |
| No loss                               | 19,000 | 76.5 (0.4)                           | 69.6 (0.5)                            | 16.1 (0.5)                           | 9.3 (0.3)                                    | 2.0 (0.2)                                 |
| 1 loss                                | 1917   | 75.0 (1.3)                           | 66.0 (1.5)                            | 21.4 (1.5)                           | 7.6 (0.7)                                    | 1.3 (0.2)                                 |
| 2 losses                              | 262    | 76.6 (3.4)                           | 64.8 (4.0)                            | 27.5 (4.5)                           | 9.6 (4.4)                                    | 2.1 (0.9)                                 |
| 3 or more losses                      | 98     | 72.5 (5.2)                           | 52.8 (6.7)                            | 36.2 (7.3)                           | 1.8 (1.2)                                    | 0.1 (0.1)                                 |
| At least 1 loss                       | 2277   | 75.1 (1.2)                           | 65.3 (1.4)                            | 22.8 (1.4)                           | 7.6 (0.8)                                    | 1.3 (0.2)                                 |
| Gestational age of pregnancy loss(es) |        |                                      |                                       |                                      |                                              |                                           |
| All < 6 wk                            | 379    | 67.9 (3.4)                           | 64.0 (3.5)                            | 14.5 (2.6)                           | 6.1 (1.4)                                    | 0.4 (0.3)                                 |
| Longest 6–9 wk                        | 896    | 76.4 (1.8)                           | 64.0 (2.3)                            | 24.6 (2.3)                           | 8.8 (1.2)                                    | 1.6 (0.4)                                 |
| Longest ≥ 10 wk                       | 1002   | 76.4 (1.7)                           | 66.8 (2.0)                            | 24.1 (2.2)                           | 7.2 (1.4)                                    | 1.4 (0.4)                                 |
| Recency of last pregnancy loss        |        |                                      |                                       |                                      |                                              |                                           |
| Within last 6 mo                      | 791    | 79.3 (1.8)                           | 69.3 (2.3)                            | 19.6 (2.3)                           | 7.9 (1.3)                                    | 1.3 (0.4)                                 |
| 6 to 11 mo ago                        | 390    | 76.7 (3.2)                           | 67.7 (3.6)                            | 30.7 (4.5)                           | 8.3 (3.0)                                    | 1.9 (0.7)                                 |
| 12 to 23 mo ago                       | 427    | 75.4 (2.8)                           | 64.7 (3.4)                            | 25.4 (3.4)                           | 6.1 (1.3)                                    | 0.7 (0.4)                                 |
| 24 mo or more ago                     | 585    | 67.2 (2.7)                           | 59.3 (3.0)                            | 19.9 (2.3)                           | 6.4 (1.1)                                    | 1.5 (0.5)                                 |

Unweighted sample size with population weighted percentages and standard errors.

**Supplemental Table 4**

Reproductive history by survey period among women in analytical sample (n = 21,277)

| Reproductive history                          | 1995                |        | 2002                |        | 2006–2010           |        | 2011–2013           |        |
|-----------------------------------------------|---------------------|--------|---------------------|--------|---------------------|--------|---------------------|--------|
|                                               | n = 6948<br>(25.1%) |        | n = 4453<br>(25.8%) |        | n = 6716<br>(24.6%) |        | n = 3160<br>(24.6%) |        |
|                                               | mean                | SE     | mean                | SE     | mean                | SE     | mean                | SE     |
| At time of interview                          |                     |        |                     |        |                     |        |                     |        |
| Age, y                                        | 33.78               | 0.09   | 34.01               | 0.17   | 33.92               | 0.15   | 33.85               | 0.19   |
| Gravidity, n                                  | 2.82                | 0.02   | 2.91                | 0.04   | 2.94                | 0.04   | 2.91                | 0.04   |
| Parity, n                                     | 2.18                | 0.01   | 2.13                | 0.02   | 2.24                | 0.03   | 2.20                | 0.03   |
| At least 1 loss, n                            | 0.23                | 0.01   | 0.26                | 0.01   | 0.26                | 0.01   | 0.27                | 0.01   |
| At time of first parity                       |                     |        |                     |        |                     |        |                     |        |
| Age at conception, y                          | 22.16               | 0.07   | 22.60               | 0.13   | 22.65               | 0.16   | 22.48               | 0.20   |
| Gravidity, n                                  | 1.28                | 0.01   | 1.31                | 0.02   | 1.27                | 0.01   | 1.27                | 0.02   |
| Parity, n                                     | 0.98                | 0.00   | 0.97                | 0.00   | 0.98                | 0.00   | 0.98                | 0.00   |
| At least 1 loss, n                            | 0.10                | 0.00   | 0.11                | 0.01   | 0.11                | 0.01   | 0.13                | 0.01   |
| Number of pregnancy losses: % (SE)            |                     |        |                     |        |                     |        |                     |        |
| No loss                                       | 90.11               | (0.47) | 88.68               | (0.69) | 88.79               | (0.66) | 87.43               | (0.85) |
| 1 loss                                        | 8.36                | (0.41) | 9.63                | (0.65) | 9.37                | (0.60) | 10.45               | (0.81) |
| 2 losses                                      | 1.16                | (0.14) | 1.24                | (0.20) | 1.29                | (0.18) | 1.58                | (0.36) |
| 3 or more losses                              | 0.38                | (0.08) | 0.44                | (0.11) | 0.54                | (0.16) | 0.54                | (0.19) |
| At least 1 loss                               | 9.89                | (0.47) | 11.32               | (0.69) | 11.21               | (0.66) | 12.57               | (0.85) |
| Gestational age of pregnancy loss(es): % (SE) |                     |        |                     |        |                     |        |                     |        |
| All < 6 wk                                    | 1.62                | (0.19) | 1.82                | (0.22) | 1.48                | (0.16) | 2.33                | (0.36) |
| Longest 6–9 wk                                | 3.78                | (0.26) | 3.99                | (0.33) | 4.43                | (0.41) | 5.30                | (0.61) |
| Longest ≥ 10 wk                               | 4.49                | (0.32) | 5.51                | (0.57) | 5.29                | (0.40) | 4.93                | (0.60) |
| Recency of last pregnancy loss: % (SE)        |                     |        |                     |        |                     |        |                     |        |
| Within last 6 mo                              | 3.85                | (0.27) | 3.87                | (0.38) | 3.87                | (0.37) | 3.86                | (0.50) |
| 6 to 11 mo ago                                | 1.81                | (0.19) | 1.89                | (0.33) | 1.96                | (0.26) | 2.65                | (0.52) |
| 12 to 23 mo ago                               | 1.65                | (0.17) | 2.03                | (0.32) | 2.25                | (0.24) | 2.41                | (0.35) |
| 24 mo or more ago                             | 2.17                | (0.20) | 3.10                | (0.28) | 2.84                | (0.34) | 3.28                | (0.48) |

Unweighted sample size with population weighted percentages and standard errors.
